# Supplementary material for: Carbon dots: promising biomaterials for bone-specific imaging and drug delivery
Source: Royal Society of Chemistry journal article supplement (doi:10.1039/c7nr05731h), 2017-01-01
Supplement: c7nr05731h1.pdf [file c7nr05731h1.pdf]

## Supporting Information

### Carbon Dots: Promising Biomaterials for Bone-Specific Imaging and Drug Delivery

Zhili Peng<sup>1,2</sup>, Esmail H. Miyajji<sup>3</sup>, Yiqun Zhou<sup>2</sup>, Joel Pardo<sup>2</sup>, Sajini D. Hettiarachchi<sup>2</sup>, Shanghao Li<sup>2,4</sup>, Patricia L. Blackwelder<sup>5,6</sup>, Isaac Skromne<sup>3,7\*</sup> and Roger M. Leblanc<sup>2\*</sup>

<sup>1</sup>College of Pharmacy and Chemistry, Dali University, Dali, Yunnan, 671000, P. R. China

<sup>2</sup>Department of Chemistry, University of Miami, 1301 Memorial Drive, Coral Gables, Florida, 33146, United States

<sup>3</sup>Department of Biology, University of Miami, 1301 Memorial Drive, Coral Gables, Florida, 33146, United States

<sup>4</sup>MP Biomedicals, 3 Hutton Center Dr. #100, Santa Ana, CA 92707, United States

<sup>5</sup>Center for Advanced Microscopy and Marine Geosciences, University of Miami, 1301 Memorial Drive, Coral Gables, Florida, 33146, United States

<sup>6</sup>Nova Southeastern University Oceanographic Center, 8000 North Ocean Drive, Dania, Florida, 33004, United States

<sup>7</sup>Department of Biology, University of Richmond, 28 Westhampton Way, Richmond, Virginia, 23173, United States

**\*Corresponding authors:**

(I.S.) Tel.: +1-804-289-8235; Fax: + 1-804-289-8233. E-mail: [iskromne@richmond.edu](mailto:iskromne@richmond.edu).

(R.M.L) Tel.: +1-305-284-2194; Fax: + 1-305-284-6367. E-mail: [rml@miami.edu](mailto:rml@miami.edu).

**Keywords:** carbon dots; calcified bone; drug delivery; fluorescence imaging; zebrafish

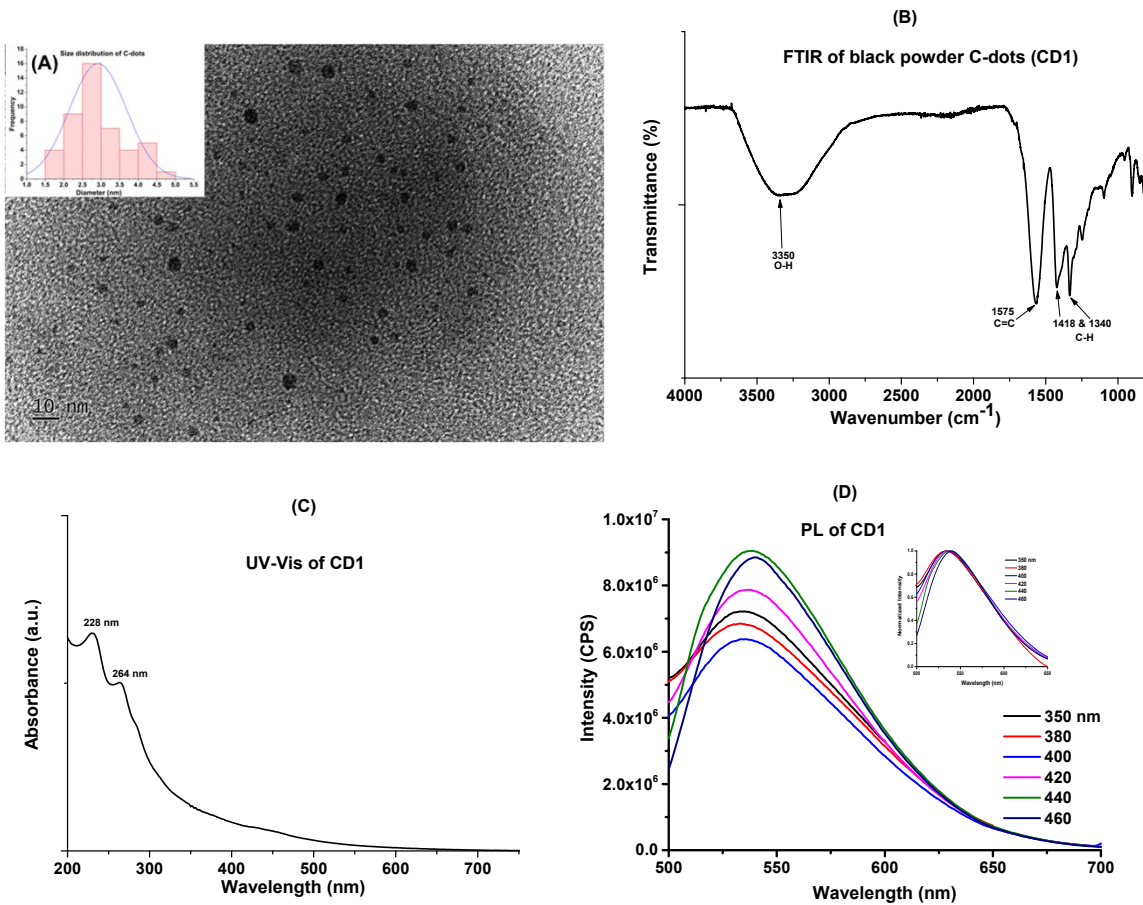

**Figure SI 1. Characterization of black powder C-dots (CD1).** (A): TEM, inset is the size distributions of the particles; (B): FTIR spectroscopy; (C): UV-Vis absorption spectroscopy and (D) fluorescence spectroscopy, inset is the normalized spectra.

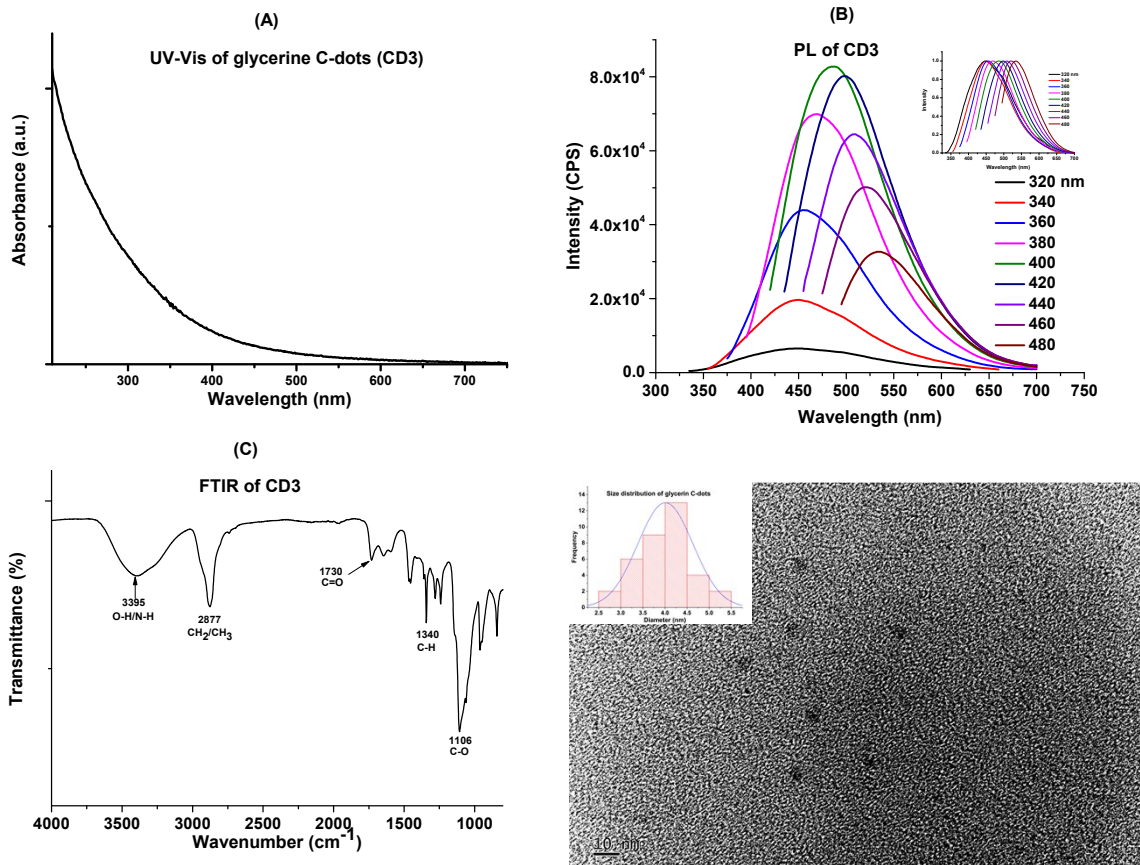

**Figure SI 2.** Characterization of glycerin C-dots (CD3). (A): UV-Vis absorption spectroscopy; (B): fluorescence spectroscopy, inset is the normalized spectra; (C): FTIR spectroscopy and (D) TEM, inset is the size distributions of the particles.

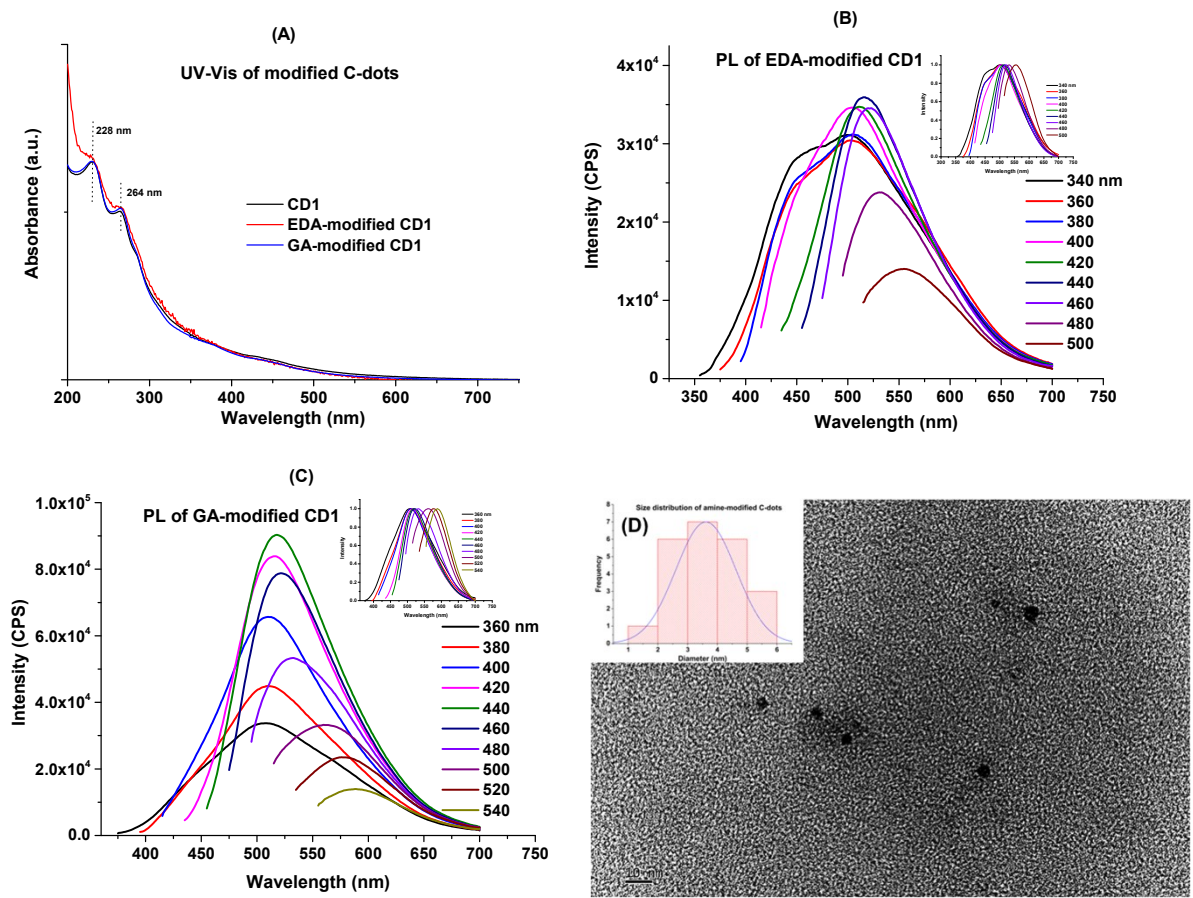

**Figure SI 3.** Characterization of EDA-CD1 and GA-CD1 conjugates. (A): UV-Vis absorption spectroscopy; (B): fluorescence spectroscopy of EDA-CD1, inset is the normalized spectrum; (C): fluorescence spectroscopy of GA-CD1, inset is the normalized spectra and (D) TEM of EDA-CD1, inset is the size distributions of the particles.

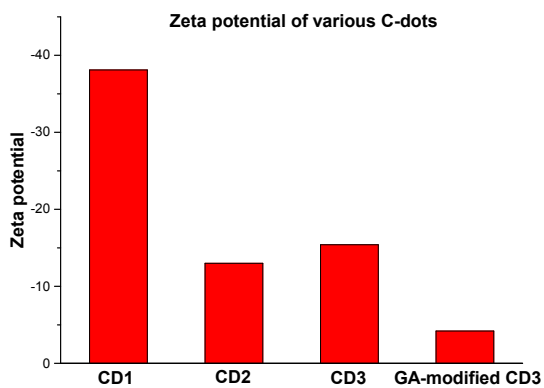

**Figure SI 4.** Zeta potential of GA-CD3 and other C-dots.

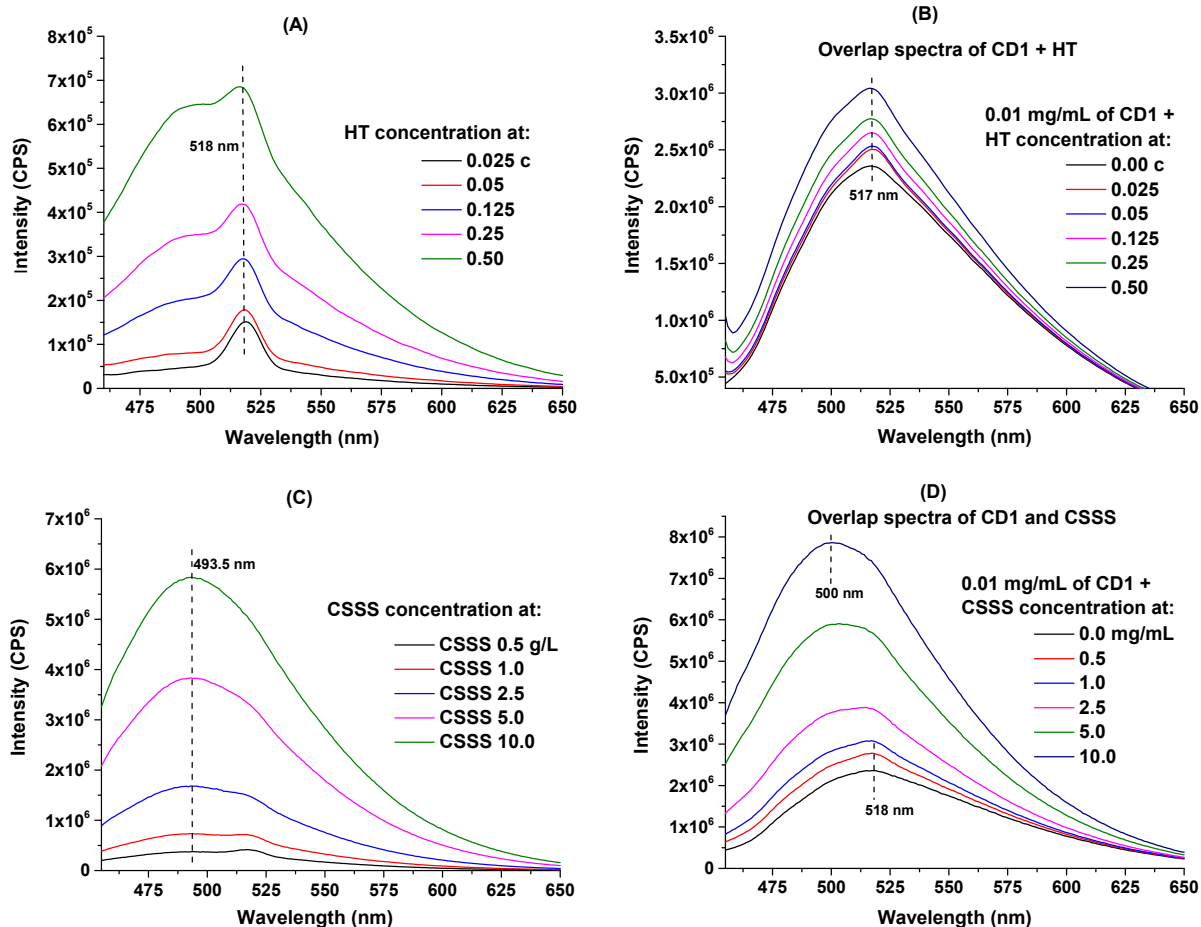

**Figure SI 5.** Mechanistic study of CD1 and bone interaction: (A), fluorescence spectroscopy of hydroxyapatite (HT) at various concentrations; (B), overlap spectra of CD1 and HT, obtained by first taking the fluorescence spectrum of 0.01 mg/mL CD1 and various concentrations of HT individually, then overlap the spectra by mathematically adding them up; (C), fluorescence spectroscopy of chondroitin sulfate sodium salt (CSSS) at various concentrations; (D), overlap spectra of CD1 and CSSS, obtained by first taking the fluorescence spectrum of 0.01 mg/mL CD1 and various concentrations of CSSS individually, then overlap the spectra by mathematically adding them up.
